# Supplementary material for: Development and Evaluation of a Quality Assessment Tool for Laparoscopic Sleeve Gastrectomy Videos: A Review and Comparison of Academic and Online Video Resources
Source: Springer Nature journal article supplement (doi:10.1007/s11695-024-07199-0), 2024-04-06
Supplement: MOESM1 [file 26952184]

**Supplementary File 1:**

| Score                             | Assessor 1<br>(Academic) |    | Assessor 1<br>(YouTube) |    | Assessor 2<br>(Academic) |    | Assessor 2<br>(YouTube) |    |
|-----------------------------------|--------------------------|----|-------------------------|----|--------------------------|----|-------------------------|----|
|                                   | Yes                      | No | Yes                     | No | Yes                      | No | Yes                     | No |
| Distance from pylorus             | 11                       | 15 | 27                      | 40 | 13                       | 13 | 29                      | 38 |
| Distance from GOJ                 | 20                       | 6  | 48                      | 19 | 21                       | 5  | 45                      | 22 |
| Use of Orogastric tube            | 24                       | 2  | 60                      | 7  | 24                       | 2  | 60                      | 7  |
| Orogastric tube size (when used)  | 22                       | 2  | 7                       | 53 | 22                       | 2  | 7                       | 53 |
| Dissection of proximal stomach    | 16                       | 10 | 58                      | 9  | 14                       | 22 | 60                      | 7  |
| Staple line reinforcement         | 16                       | 10 | 31                      | 36 | 18                       | 8  | 30                      | 37 |
| Leak test                         | 8                        | 18 | 16                      | 51 | 9                        | 17 | 17                      | 50 |
| Volume of Sleeve                  | 0                        | 26 | 0                       | 67 | 0                        | 26 | 0                       | 67 |
| Stapler information (size & type) | 18                       | 8  | 30                      | 37 | 17                       | 9  | 28                      | 39 |
| Aim of video uploaded             | 26                       | 0  | 67                      | 0  | 26                       | 0  | 67                      | 0  |
| Complications/30-day outcome      | 14                       | 12 | 0                       | 67 | 14                       | 12 | 0                       | 67 |

| Score                             | Assessor 3<br>(Academic) |    | Assessor 3<br>(YouTube) |    | Assessor 4<br>(Academic) |    | Assessor 4<br>(YouTube) |    |
|-----------------------------------|--------------------------|----|-------------------------|----|--------------------------|----|-------------------------|----|
|                                   | Yes                      | No | Yes                     | No | Yes                      | No | Yes                     | No |
| Distance from pylorus             | 10                       | 12 | 22                      | 41 | 11                       | 11 | 33                      | 30 |
| Distance from GOJ                 | 16                       | 6  | 27                      | 36 | 15                       | 7  | 27                      | 36 |
| Use of Orogastric tube            | 15                       | 7  | 56                      | 7  | 15                       | 7  | 56                      | 7  |
| Orogastric tube size (when used)  | 13                       | 9  | 8                       | 55 | 13                       | 9  | 12                      | 51 |
| Dissection of proximal stomach    | 18                       | 4  | 59                      | 4  | 16                       | 6  | 57                      | 6  |
| Staple line reinforcement         | 16                       | 6  | 28                      | 35 | 16                       | 6  | 28                      | 35 |
| Leak test                         | 8                        | 14 | 12                      | 51 | 8                        | 14 | 13                      | 50 |
| Volume of Sleeve                  | 0                        | 22 | 3                       | 60 | 0                        | 22 | 6                       | 57 |
| Stapler information (size & type) | 15                       | 7  | 20                      | 43 | 14                       | 8  | 21                      | 42 |
| Aim of video uploaded             | 21                       | 1  | 62                      | 1  | 21                       | 1  | 56                      | 7  |
| Complications/30-day outcome      | 13                       | 9  | 2                       | 61 | 13                       | 9  | 3                       | 60 |

| Score                             | Assessor 5 (Academic) |    | Assessor 5 (YouTube) |    | Assessor 6 (Academic) |    | Assessor 6 (YouTube) |    |
|-----------------------------------|-----------------------|----|----------------------|----|-----------------------|----|----------------------|----|
|                                   | Yes                   | No | Yes                  | No | Yes                   | No | Yes                  | No |
| Distance from pylorus             | 8                     | 14 | 24                   | 39 | 12                    | 10 | 23                   | 40 |
| Distance from GOJ                 | 14                    | 8  | 30                   | 63 | 17                    | 5  | 32                   | 31 |
| Use of Orogastric tube            | 15                    | 7  | 56                   | 7  | 15                    | 7  | 56                   | 7  |
| Orogastric tube size (when used)  | 13                    | 9  | 9                    | 54 | 10                    | 12 | 9                    | 54 |
| Dissection of proximal stomach    | 18                    | 4  | 59                   | 4  | 18                    | 4  | 60                   | 3  |
| Staple line reinforcement         | 16                    | 6  | 28                   | 35 | 16                    | 6  | 28                   | 35 |
| Leak test                         | 9                     | 13 | 9                    | 54 | 8                     | 14 | 13                   | 50 |
| Volume of Sleeve                  | 0                     | 22 | 8                    | 55 | 1                     | 21 | 3                    | 60 |
| Stapler information (size & type) | 15                    | 7  | 23                   | 40 | 15                    | 7  | 25                   | 38 |
| Aim of video uploaded             | 21                    | 1  | 61                   | 2  | 21                    | 1  | 58                   | 5  |
| Complications/30-day outcome      | 13                    | 9  | 2                    | 61 | 13                    | 9  | 2                    | 61 |
